# Supplementary material
Source: PubMed Central journal article supplement (PMC4449270)
Supplement: NIHMS62633-supplement-1.pdf [file NIHMS62633-supplement-1.pdf]

**A**

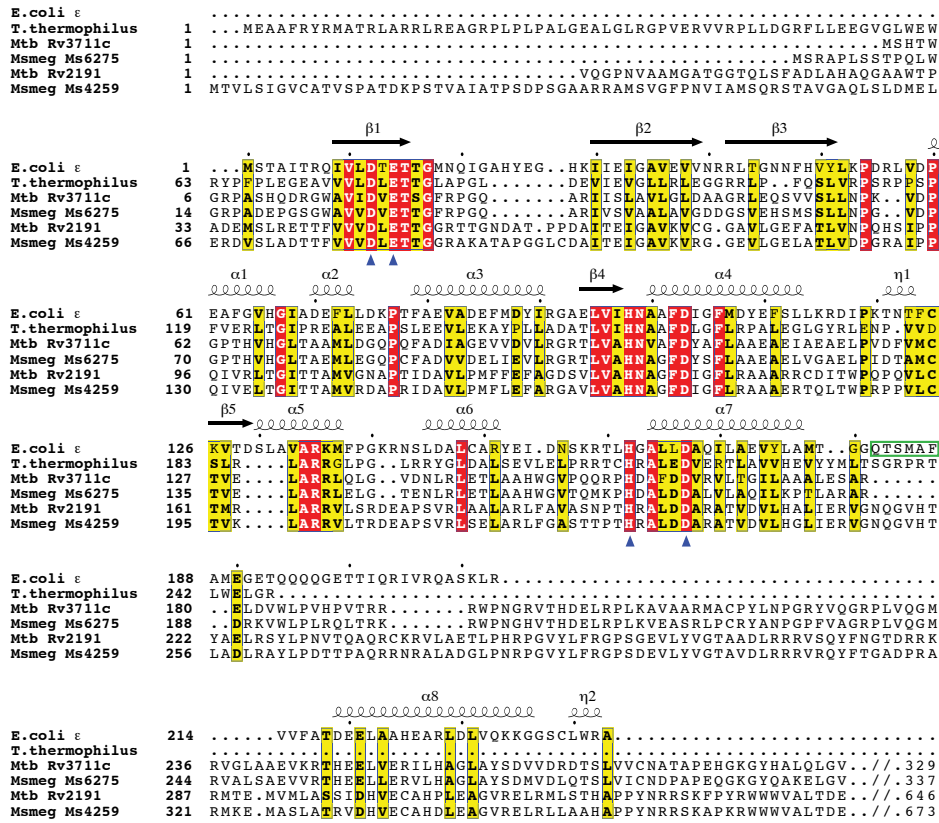

**B**

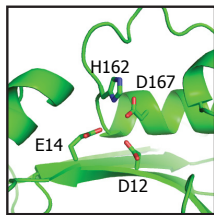

*E. coli*  $\epsilon$   
(1J54.pdb)

**C**

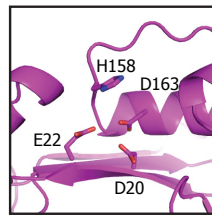

*Mtb Rv3711c*  
(model)

**D**

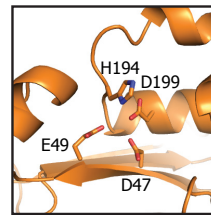

*Mtb Rv2191*  
(model)

**Supplemental Figure 1. *Mycobacterium tuberculosis* (*Mtb*) and *Mycobacterium smegmatis* contain two  $\epsilon$  (*dnaQ*) exonuclease homologues.**

(A) Sequence alignment of  $\epsilon$ -exonuclease homologues from four different species. Conserved catalytic residues of *E. coli*  $\epsilon$  are indicated by blue triangles below the sequences. The clamp binding motif of *E. coli*  $\epsilon$  is boxed in green. (B) Active site of the *E. coli*  $\epsilon$ -exonuclease. (C) Computational model of the active site of *Mtb Rv3711c*. (D) Computational model of the active site of *Mtb Rv2191*.
