# Supplementary material
Source: PubMed Central journal article supplement (PMC4449270)
Supplement: NIHMS62633-supplement-2.pdf [file NIHMS62633-supplement-2.pdf]

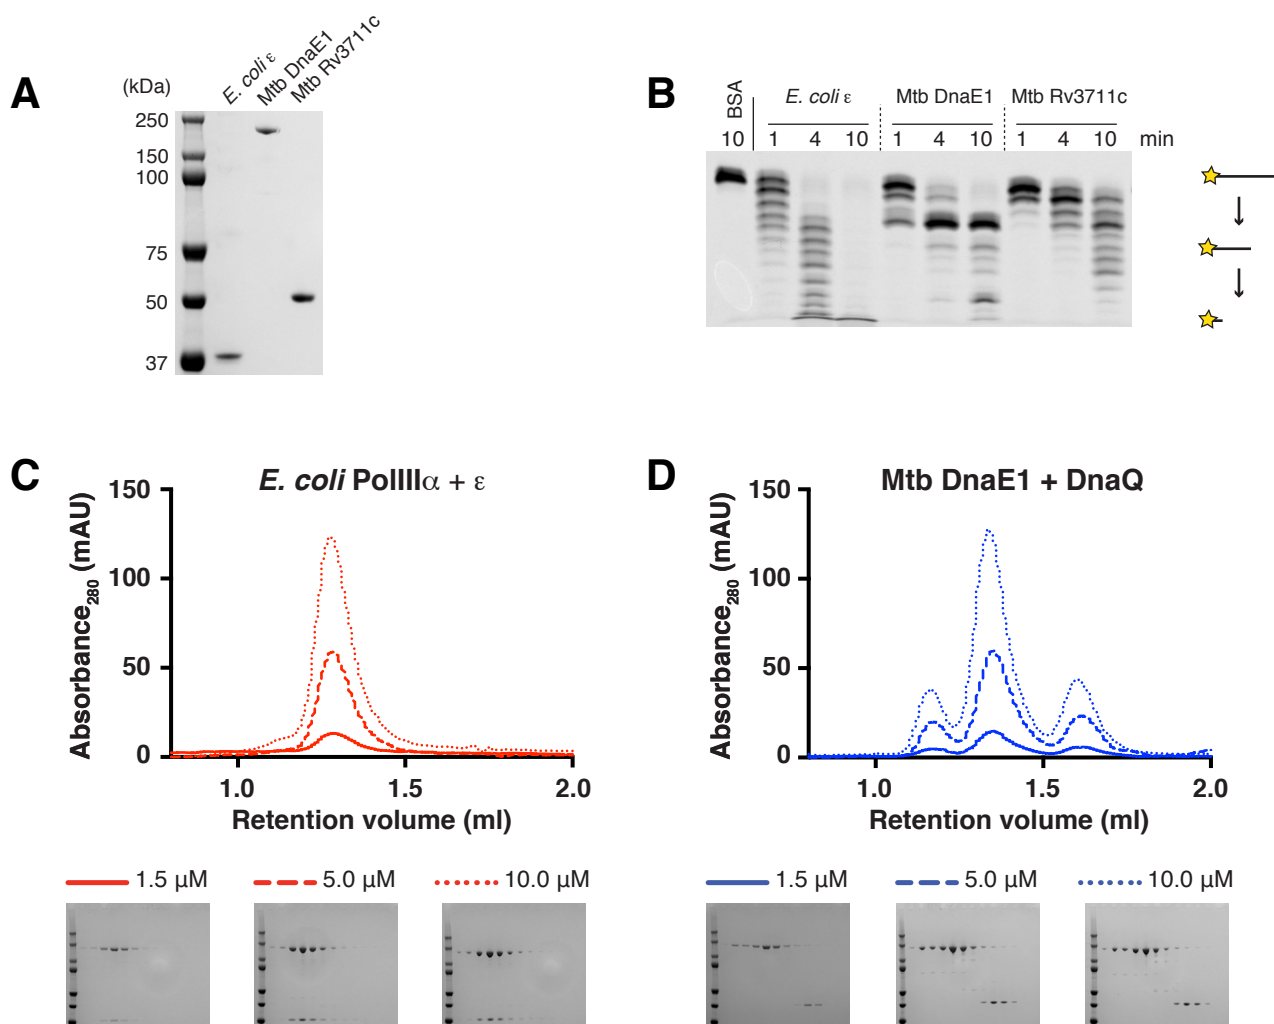

**Supplemental Figure 2. *Mycobacterium tuberculosis* (Mtb) DnaQ is a 3'-5' DNA exonuclease but does not form a stable complex with Mtb DnaE1.**

(A) Coomassie-stained gel showing purified *E. coli*  $\epsilon$ , Mtb DnaE1 and Mtb Rv3711c. (B) Gel showing 3'-5' exonuclease activity assay with *E. coli*  $\epsilon$ , Mtb DnaE1 and Mtb Rv3711c.

(C) Analytical size exclusion chromatography shows that *E. coli* PolIII $\alpha$  and *E. coli*  $\epsilon$  form a stable complex at concentrations as low as 1.5  $\mu$ M. (D) In contrast, Mtb DnaE1 and DnaQ (Rv3711c) don't reveal any interaction even at 10  $\mu$ M protein concentration (all equimolar amounts).
