# Supplementary material
Source: PubMed Central journal article supplement (PMC4449270)
Supplement: NIHMS62633-supplement-4.pdf [file NIHMS62633-supplement-4.pdf]

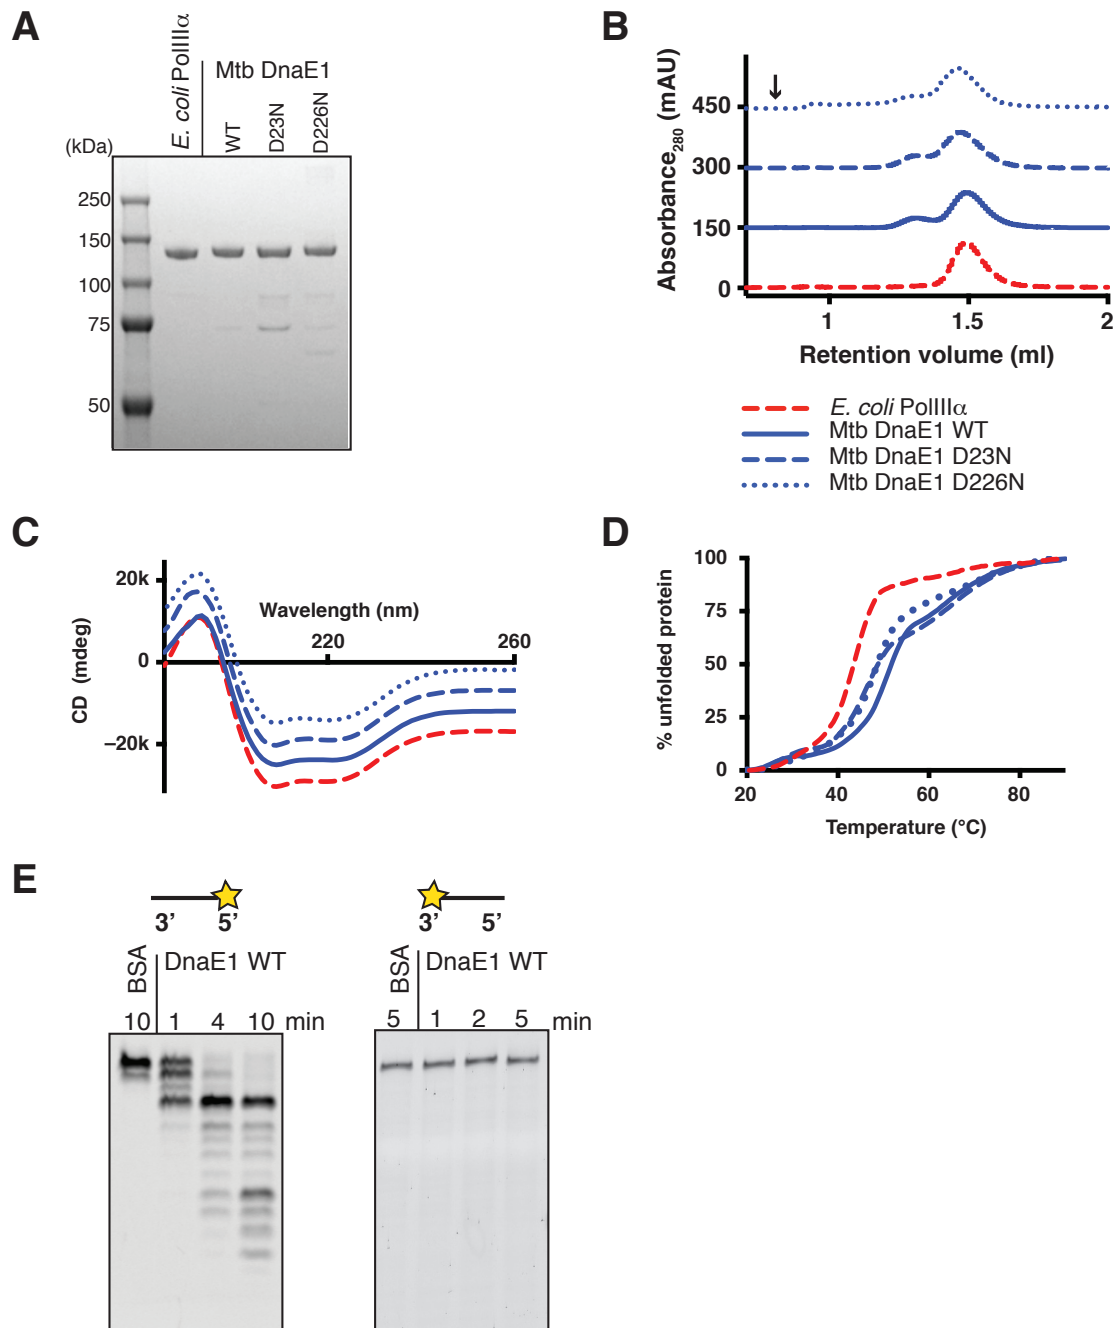

**Supplemental Figure 4. *M. tuberculosis* DnaE1 and PHP mutants are properly folded.**

**(A)** SDS-PAGE analysis of purified proteins. Each lane contains 3.5 pmol (~0.5  $\mu$ g) protein. Gel was stained with Coomassie Brilliant Blue. **(B)** Purified proteins do not show any aggregation as judged by size exclusion chromatography. Arrow indicates the void volume (at 0.8 ml). For clarity, graphs are shifted vertically by 150 mAU. **(C)** Circular dichroism spectra show that WT DnaE1 and PHP mutants are properly folded. **(D)** Thermal denaturation curves show that wild-type and mutant DnaE1 have similar melting temperatures of 45-50°C. **(E)** Time course of exonuclease activity on single-stranded DNA. Wild-type Mtb DnaE1 shows 3'-5' exonuclease activity but not 5'-3' exonuclease activity.
