# Supplementary material
Source: PubMed Central journal article supplement (PMC4449270)
Supplement: NIHMS62633-supplement-5.pdf [file NIHMS62633-supplement-5.pdf]

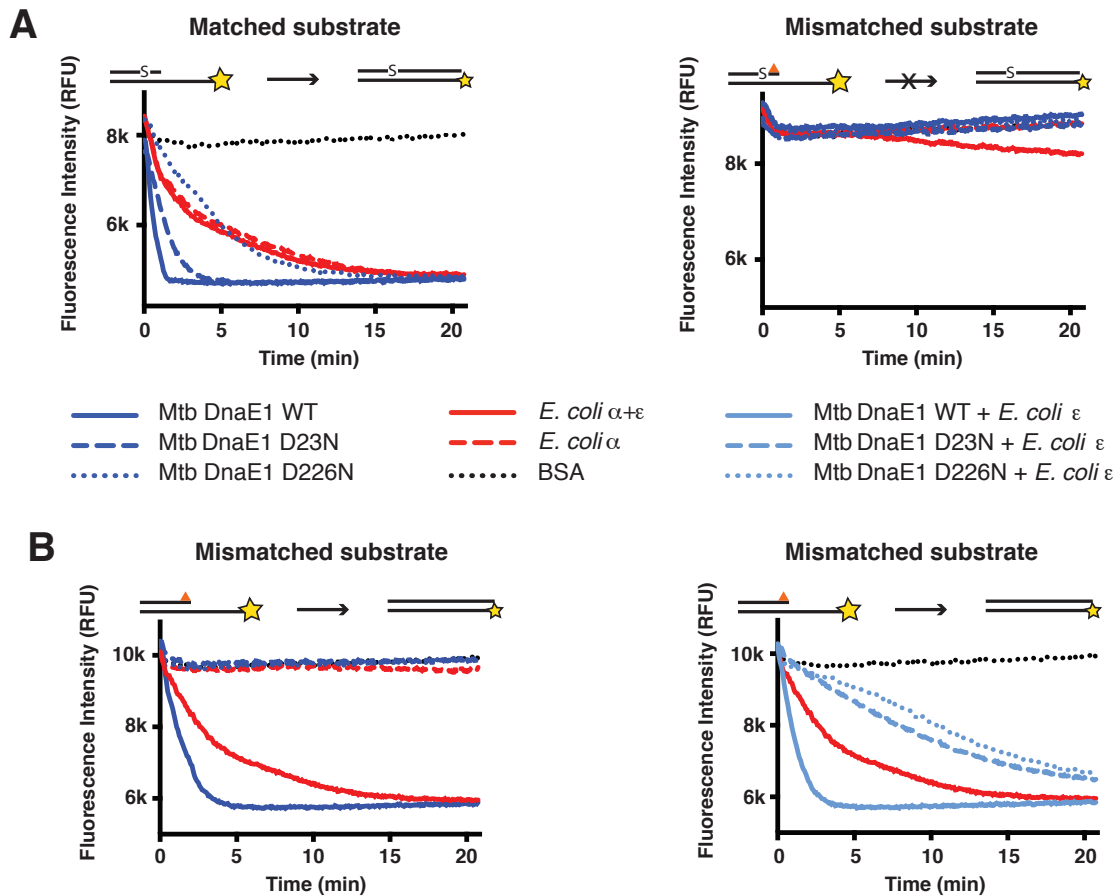

**Supplemental Figure 5. Primer extension from mismatched substrates requires exonuclease activity.**

**(A)** Primer extension from mismatched substrates by wild-type Mtb DnaE1 and *E. coli* PolIII $\alpha+\epsilon$  is blocked by a phosphorothioate linkage (denoted by -S-) that is resistant to exonuclease activity. In contrast, a matched primer with a terminal phosphorothioate linkage can be extended normally. **(B)** Addition of *E. coli*  $\epsilon$ -exonuclease in *trans* allows Mtb DnaE1 PHP mutants to extend from mismatched DNA substrates.
