# Supplementary material
Source: PubMed Central journal article supplement (PMC4449270)
Supplement: NIHMS62633-supplement-6.pdf [file NIHMS62633-supplement-6.pdf]

**A**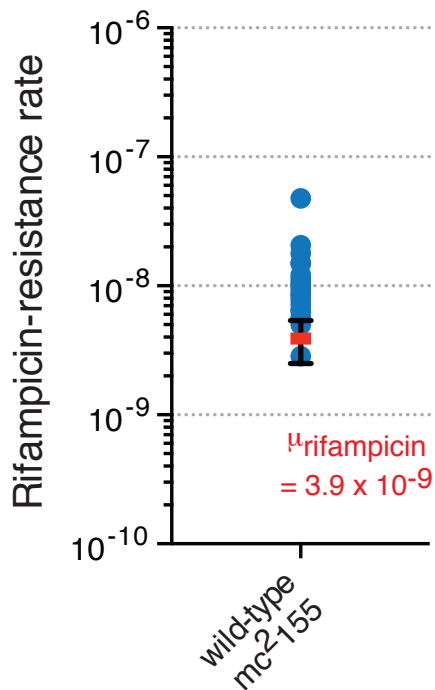**B**

| Mutation | Amino acid change |
|----------|-------------------|
| CAG>AAG  | Q429K             |
| CAG>CTG  | Q429L             |
| GAC>GTC  | D432V             |
| TCG>TTG  | S438L             |
| CAC>CGC  | H442R             |
| CAC>CCC  | H442P             |
| CAC>TAC  | H442Y             |
| CAC>GAC  | H442D             |
| TCG>TTG  | S447L             |
| TCG>TGG  | S447F             |

  

|                                  |                               |
|----------------------------------|-------------------------------|
| $\mu_{\text{rifampicin}}$        | $3.9 \times 10^{-9}$          |
| $\mu_{\text{rifampicin}}$ 95% CI | $(2.5 - 5.4) \times 10^{-9}$  |
| Rifampicin target size (bp)      | 10                            |
| $\mu_{\text{in vitro}}$          | $3.9 \times 10^{-10}$         |
| $\mu_{\text{in vitro}}$ 95% CI   | $(2.5 - 5.4) \times 10^{-10}$ |

**Supplemental Figure 6. The per base pair mutation rate of *M. smegmatis* estimated from fluctuation analysis.**

**(A)** Fluctuation analysis was used to determine the rates at which wild-type *M. smegmatis* acquired resistance to rifampicin. Circles represent mutant frequency (number of rifampicin-resistant mutants per cell plated in a single culture). The red bar represents the estimated mutation rate (mutations conferring rifampicin resistance per generation), with error bars representing the 95% confidence interval (CI). **(B)** The number of mutations in *rpoB* (*Ms1367*) that confer rifampicin resistance in our fluctuation analysis was determined by sequencing 150 independent rifampicin-resistant isolates. This analysis identified ten unique mutations. The per base pair mutation rate,  $\mu_{\text{in vitro}}$ , was determined by dividing  $\mu_{\text{rifampicin}}$  by the target size.
