# Supplementary material
Source: PubMed Central journal article supplement (PMC4449270)
Supplement: NIHMS62633-supplement-7.pdf [file NIHMS62633-supplement-7.pdf]

**A**

| Genome Coordinate | Reference Base | Alternative Base | Effect                  | SNP Prevalence         |
|-------------------|----------------|------------------|-------------------------|------------------------|
| 1747837           | C              | G                | silent_T46              | 1 in 1725              |
| 1747972           | C              | T                | silent_D91              | 6 in 1725              |
| 1747984           | G              | T                | K95N                    | 1 in 1725              |
| 1747987           | C              | G ; T            | silent_A96 ; silent_A96 | 22 in 1725 ; 1 in 1725 |
| 1748131           | C              | T                | silent_L144             | 6 in 1725              |
| 1748145           | C              | T                | A149V                   | 1 in 1725              |
| 1748152           | C              | T                | silent_G151             | 1 in 1725              |
| 1748445           | C              | T                | T249I                   | 52 in 1725             |

**B**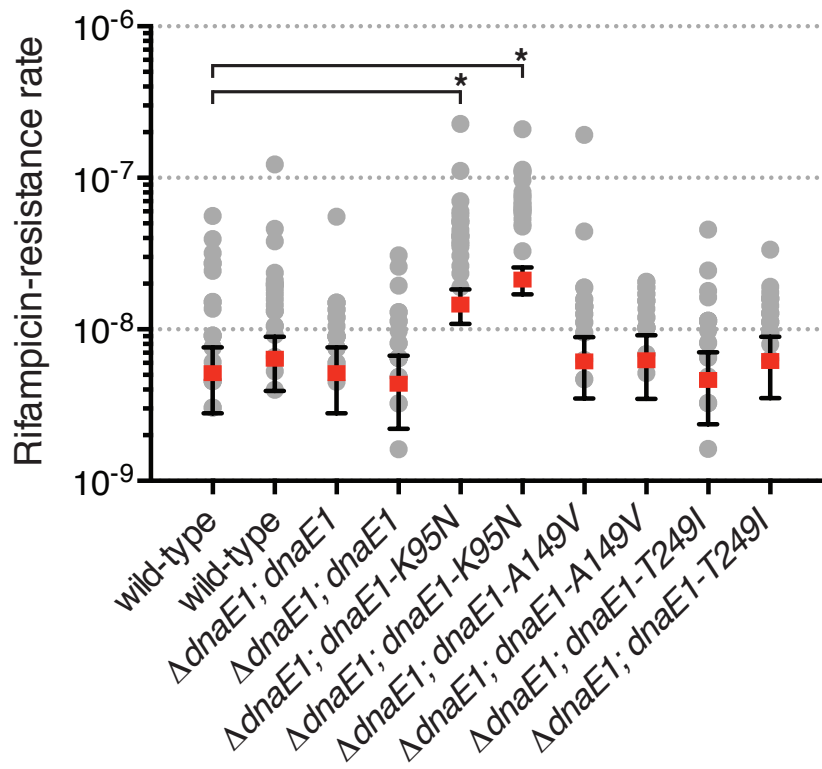

**Supplemental Figure 7. Loss-of-function mutations in the *dnaE1* PHP domain are rarely found in clinical *M. tuberculosis* isolates.**

(A) *dnaE1* (*Rv1547*) PHP domain single nucleotide polymorphisms (SNPs) observed in clinical *M. tuberculosis* isolates. SNP prevalence refers to the number of clinical strains containing the indicated SNP as compared to the total number of clinical strains analyzed. See Supplemental Table 3 for additional information. (B) Fluctuation analysis was used to determine the rates at which the indicated *M. smegmatis* strains acquired resistance to rifampicin. With the exception of wild-type *M. smegmatis*, these strains harbor a deletion of the endogenous *dnaE1* (*Ms3178*) gene and have been complemented with the indicated *M. tuberculosis dnaE1* (*Rv1547*) gene. Circles represent mutant frequency (number of rifampicin-resistant mutants per cell plated in a single culture). The red bar represents the estimated mutation rate (mutations conferring rifampicin resistance per generation), with error bars representing the 95% confidence interval (CI). \*  $P < 0.05$  in comparison of mutant frequencies by Wilcoxon rank-sum test.
