# Supplementary material
Source: PubMed Central journal article supplement (PMC4449270)
Supplement: NIHMS62633-supplement-8.pdf [file NIHMS62633-supplement-8.pdf]

## Supplemental Table 1. Bacterial strains used in this study.

For the sake of simplicity, Mtb DnaE1 numbering was used throughout the paper.

Mtb DnaE1 D23 = Msmeg DnaE1 D25

Mtb DnaE1 D226 = Msmeg DnaE1 D228

### *M. smegmatis*

All strains are derivatives of mc<sup>2</sup>155 with the exception of the protein production strain, which is a derivative of mc<sup>2</sup>4517.

| Strain # | Genotype                                                 |
|----------|----------------------------------------------------------|
| 1        | wild-type mc <sup>2</sup> 155                            |
| 19       | $\Delta$ dnaE1::Hyg dnaE1::L5(Zeo) [Ms3178]              |
| 22       | $\Delta$ dnaE1::Hyg dnaE1::L5(Kan) [Ms3178]              |
| 30       | $\Delta$ dnaE1::Hyg dnaE1::L5(Kan) [Rv1547]              |
| 48       | dnaE1-MYC::L5(Kan) [Ms3178]                              |
| 58       | dnaE1-D228N-MYC::L5(Kan) [Ms3178]                        |
| 62       | $P_{UV15-Tet}$ -dnaE1-MYC::L5(Kan) [Ms3178]              |
| 90       | $P_{UV15-Tet}$ -dnaE1-D228N-MYC::L5(Kan) [Ms3178]        |
| 121      | dnaE1-D25N-MYC::L5(Kan) [Ms3178]                         |
| 128      | groEL $\Delta$ C $P_{acet}$ -T7 RNA polymerase::L5(Kan)  |
| 215      | $P_{UV15-Tet}$ -dnaE1-MYC::L5(Kan) [Rv1547]              |
| 217      | $P_{UV15-Tet}$ -dnaE1-D23N-MYC::L5(Kan) [Rv1547]         |
| 221      | $P_{UV15-Tet}$ -dnaE1-D226N-MYC::L5(Kan) [Rv1547]        |
| 223      | $P_{UV15-Tet}$ -dnaE1-D25N-MYC::L5(Kan) [Ms3178]         |
| 248      | $\Delta$ dnaE1::Hyg dnaE1-K95N::L5(Kan) [Rv1547]         |
| 251      | $\Delta$ dnaE1::Hyg dnaE1-T249I::L5(Kan) [Rv1547]        |
| 285      | $\Delta$ dnaE1::Hyg dnaE1-A149V::L5(Kan) [Rv1547]        |
| CF1      | $\Delta$ dnaQ (Ms6275)                                   |
| CF2      | $\Delta$ Ms4259                                          |
| CF3      | $\Delta$ dnaQ (Ms6275) $\Delta$ Ms4259                   |
| MA3      | $\Delta$ dnaE1::Hyg dnaE1-D228N+silent::L5(Kan) [Ms3178] |
| MA4      | $\Delta$ dnaE1::Hyg dnaE1-D25N+silent::L5(Kan) [Ms3178]  |

### *M. tuberculosis* (all strains are derivatives of H37Rv)

|     |                         |
|-----|-------------------------|
| CF4 | wild-type H37Rv         |
| CF5 | $\Delta$ dnaQ (Rv3711c) |

### *E. coli*

|                |                                                                                                                                                                    |
|----------------|--------------------------------------------------------------------------------------------------------------------------------------------------------------------|
| BL21-Gold(DE3) | <i>E. coli</i> B F <sup>-</sup> ompT hsdS(r <sub>g</sub> <sup>-</sup> m <sub>g</sub> <sup>-</sup> ) dcm <sup>+</sup> Tet <sup>r</sup> gal $\lambda$ (DE3) endA Hte |
|----------------|--------------------------------------------------------------------------------------------------------------------------------------------------------------------|

**Supplemental Table 2. Plasmids generated for this study.**

| <b>Plasmid #</b> | <b>Description</b>                                            |
|------------------|---------------------------------------------------------------|
| 14               | <i>dnaE1::L5(Kan) [Rv1547]</i>                                |
| 17               | $\Delta$ <i>dnaE1::lox-Hyg-lox [Ms3178]</i>                   |
| 23               | <i>dnaE1::L5(Kan) [Ms3178]</i>                                |
| 30               | <i>dnaE1::L5(Zeo) [Ms3178]</i>                                |
| 40               | <i>dnaE1-D228N::L5(Kan) [Ms3178]</i>                          |
| 42               | <i>dnaE1-MYC::L5(Kan) [Ms3178]</i>                            |
| 50               | <i>dnaE1-D228N-MYC::L5(Kan) [Ms3178]</i>                      |
| 53               | <i>P<sub>UV15-Tet</sub>-dnaE1-MYC::L5(Kan) [Ms3178]</i>       |
| 57               | <i>dnaE1-D25N-MYC::L5(Kan) [Ms3178]</i>                       |
| 65               | <i>P<sub>UV15-Tet</sub>-dnaE1-D228N-MYC::L5(Kan) [Ms3178]</i> |
| 84               | <i>dnaE1-MYC::L5(Kan) [Rv1547]</i>                            |
| 87               | <i>dnaE1-D228N+silent::L5(Kan) [Ms3178]</i>                   |
| 113              | <i>dnaE1-D25N::L5(Kan) [Ms3178]</i>                           |
| 143              | <i>P<sub>UV15-Tet</sub>-dnaE1-MYC::L5(Kan) [Rv1547]</i>       |
| 144              | <i>P<sub>UV15-Tet</sub>-dnaE1-D23N-MYC::L5(Kan) [Rv1547]</i>  |
| 146              | <i>P<sub>UV15-Tet</sub>-dnaE1-D226N-MYC::L5(Kan) [Rv1547]</i> |
| 147              | <i>P<sub>UV15-Tet</sub>-dnaE1-D25N-MYC::L5(Kan) [Ms3178]</i>  |
| 161              | <i>dnaE1-D25N+silent::L5(Kan) [Ms3178]</i>                    |
| UFL1             | <i>6xHis-dnaE1 [Rv1547; pYUB28b-Hyg]</i>                      |
| UFL2             | <i>6xHis-dnaE1-D23N [Rv1547; pYUB28b-Hyg]</i>                 |
| UFL3             | <i>6xHis-dnaE1-D226N [Rv1547; pYUB28b-Hyg]</i>                |
| UFL4             | <i>PollIII alpha (E. coli) [pET3c-Amp]</i>                    |
| UFL5             | <i>6xHis-epsilon (E. coli) [pET28a-pp-Kan]</i>                |
| UFL6             | <i>6xHis-dnaQ [Rv3711c; pET28a-pp-Kan]</i>                    |

## Supplemental Table 6. DNA substrates used in this study

Red letters in bold/underline indicate position of mismatched bases. Blue, lower case 's' indicates position of the phosphorothioate linkage.

### Real-time primer extension assay

|                                 |                                                    |
|---------------------------------|----------------------------------------------------|
| matched                         | 5' TAGGACGAAGGACTCCCAACTTTAGGTGCG                  |
|                                 | 3' ATCCTGCTTCCTGAGGGTTGAAATCCACGCCCCCCCC-[ 6FAM ]  |
| mismatched                      | 5' TAGGACGAAGGACTCCCAACTTTAGGTGCT                  |
|                                 | 3' ATCCTGCTTCCTGAGGGTTGAAATCCACGCCCCCCCC-[ 6FAM ]  |
| matched,<br>phosphorothioate    | 5' TAGGACGAAGGACTCCCAACTTTAGGTGCSG                 |
| mismatched,<br>phosphorothioate | 5' TAGGACGAAGGACTCCCAACTTTAGGTGCS                  |
|                                 | 3' ATCCTGCTTCCTGAGGGTTGAAATCCACG-CCCCCCCC-[ 6FAM ] |

### Gel analysis primer extension assay

|                           |                                    |
|---------------------------|------------------------------------|
| matched                   | [ 6FAM ]-5' GAGTCCTTCGTCCTT        |
|                           | 3' CTCAGGAAGCAGGAATTTTGCTGTCTGTGAA |
| mismatched -1 TG          | [ 6FAM ]-5' GAGTCCTTCGTCCTT        |
|                           | 3' CTCAGGAAGCAGGAATTTTGCTGTCTGTGAA |
| mismatched -1 TC          | [ 6FAM ]-5' GAGTCCTTCGTCCTT        |
|                           | 3' CTCAGGAAGCAGGAATTTTGCTGTCTGTGAA |
| mismatched -2 TG          | [ 6FAM ]-5' GAGTCCTTCGTCCTT        |
|                           | 3' CTCAGGAAGCAGGAATTTTGCTGTCTGTGAA |
| mismatched -2 TC          | [ 6FAM ]-5' GAGTCCTTCGTCCTT        |
|                           | 3' CTCAGGAAGCAGGAATTTTGCTGTCTGTGAA |
| ara-A inhibition<br>assay | [ 6FAM ]-5' GAGTCCTTCGTCCTT        |
|                           | 3' CTCAGGAAGCAGGAAGTCAGTCAGTCAGTCA |

### Gel analysis exonuclease assay

|                                   |                                       |
|-----------------------------------|---------------------------------------|
| single-stranded,<br>with 5' label | [ 6FAM ]-5' GTTCACGAGACCTACTGACACTGA  |
| single-stranded,<br>with 3' label | 5' GTTCACGAGACCTACTGACACTGA -[ 6FAM ] |
